# Supplementary material
Source: Springer Nature journal article supplement (https://www.springermedizin.de/resource/supplementary/12887_2012_775_MOESM2_ESM.pdf/9476208)

**a**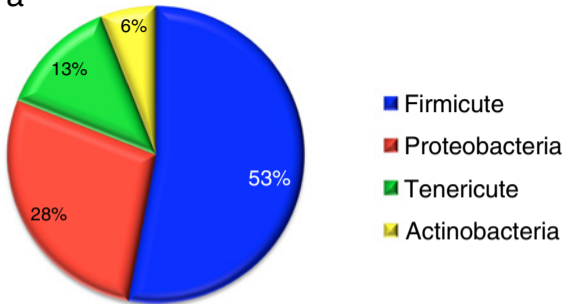**b****WEEK 1**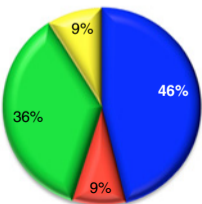**WEEK 2**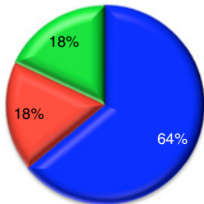**WEEK 3**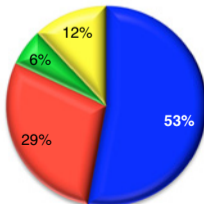**WEEK 4**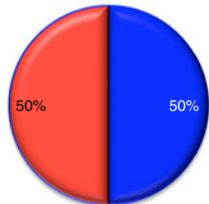

Supplement: MOESM2 [file 9476208]
